# Supplementary material
Source: publisher figshare collection journal article supplement (https://karger.figshare.com/ndownloader/files/35099110)
Supplement: Supplementary file 1 [file 35099110]

**Supplemental tables** Olesen et al

**Supplementary Table 1: The VH and VL sequences of the 7E5 NALAPG and MOTA NALAPG antibodies**

**
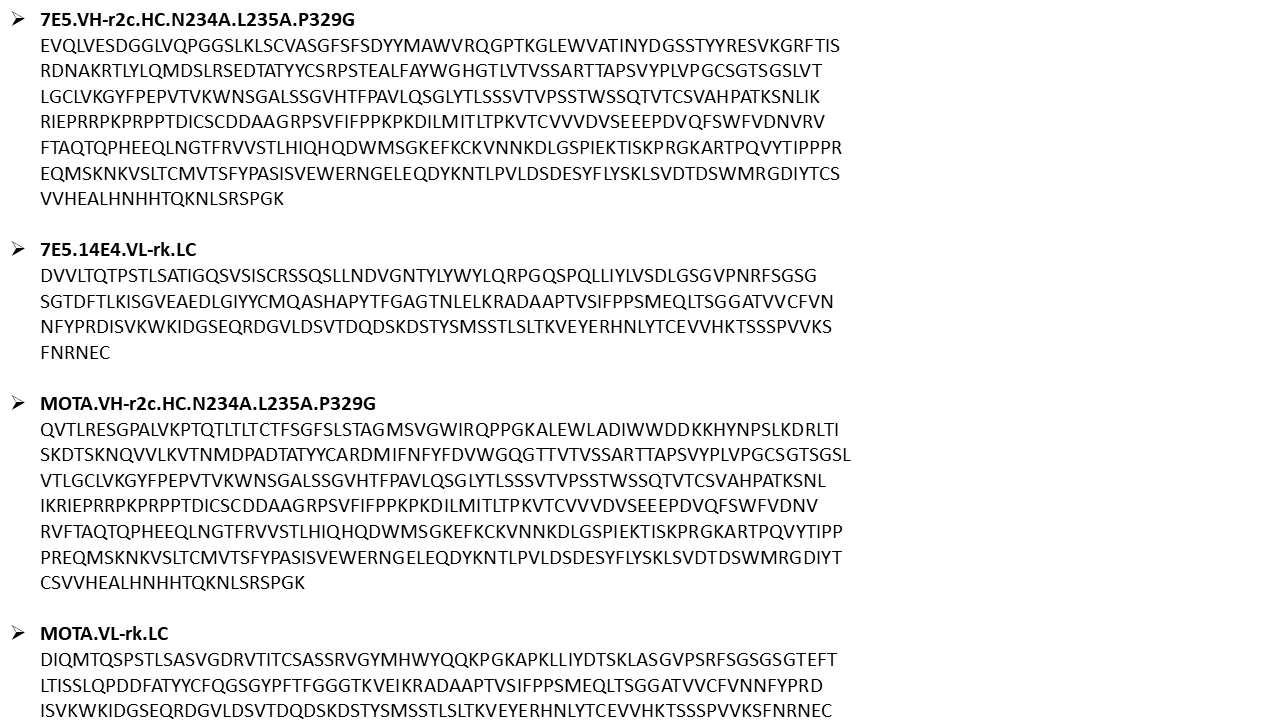
**

**Supplementary Table 2. Summary of dissociation constants derived from BLI data.**

| Ligand  (immobilized) | Analyte  (fluid phase) | averaged KD  (nM) | coupling | Figure |
| --- | --- | --- | --- | --- |
| C6 | CP10 Fab | 0.27 | Strept/bio | Fig. 6D |
| Human FIM1-2 | CP10 Fab | 2.807 | PentaHis | Fig. 6E |
| Dog FIM1-2 | CP10 Fab | 5.893 | PentaHis | Suppl Fig. 5B |
| Macaca FIM1-2 | CP10 Fab | 5.664 | PentaHis | Suppl Fig. 5B |
| Pig FIM1-2 | CP10 Fab | 4.773 | PentaHis | Suppl Fig. 5B |
| C6 | C5 C345c | 19.83 | Strept/bio | Suppl Fig. 5B |
| C5 C345c | C6 | 10.66 | Amine | Fig. 8B |
| C5 C345c | FIM1-2 | 4.84 | Amine | Fig. 8B |

**Supplementary table 3. Statistics for data collection and refinement**. Values for the highest-resolution shell are shown in parentheses. The table was generated with the phenix.table_one program.

| **Data collection** | |
| --- | --- |
| Wavelength | 0.9763 |
| Resolution range | 44.44 - 2.293 (2.375 - 2.293) |
| Space group | C 1 2 1 |
| Unit cell | 161.057 63.527 128.589 90 128.363 90 |
| Total reflections | 155998 (14531) |
| Unique reflections | 45106 (4197) |
| Multiplicity | 3.5 (3.5) |
| Completeness (%) | 97.93 (91.88) |
| Mean I/sigma(I) | 12.15 (0.82) |
| Wilson B-factor | 49.63 |
| R-merge | 0.06473 (1.383) |
| CC1/2 | 0.999 (0.352) |
|  | |
| **Refinement** | |
| Reflections used in refinement | 45101 (4197) |
| Reflections used for R-free | 1988 (186) |
| R-work/R-free | 0.2102 (0.3406)/ 0.2353 (0.3321) |
| CC (work/free) | 0.956 (0.600) / 0.943 (0.642) |
| Number of non-hydrogen atoms | 5654 |
| macromolecules | 5522 |
| ligands | 7 |
| solvent | 128 |
| Protein residues | 723 |
| RMS(bonds) | 0.005 |
| RMS(angles) | 0.87 |
| Ramachandran favored (%) | 96.36 |
| Ramachandran allowed (%) | 3.50 |
| Ramachandran outliers (%) | 0.14 |
| Rotamer outliers (%) | 1.77 |
| Clashscore | 0.83 |
| Average B-factor | 60.62 |
